# Supplementary material
Source: PubMed Central journal article supplement (PMC6519457)
Supplement: NIHMS1017634-supplement-Supplementary_Table_1.pdf [file NIHMS1017634-supplement-Supplementary_Table_1.pdf]

## Supplementary Table 1 Supported Reference Proteome Genomes

| Genomes                                       | Total number of genes | Number of genes with PANTHER HMM |
|-----------------------------------------------|-----------------------|----------------------------------|
| <i>Absidia_glauca_ABSGL</i>                   | 14824                 | 10089                            |
| <i>Acaryochloris_marina_ACAM1</i>             | 8171                  | 4209                             |
| <i>Accumulibacter_phosphatis_ACCPU</i>        | 4437                  | 3129                             |
| <i>Achromobacter_xylosoxidans_ACHXA</i>       | 6797                  | 5324                             |
| <i>Acidovorax_citrulli_ACIAAC</i>             | 4601                  | 3232                             |
| <i>Acidovorax_sp_ACISJ</i>                    | 4044                  | 2905                             |
| <i>Acremonium_chrysogenum_ACRC1</i>           | 8898                  | 6882                             |
| <i>Acromyrmex_echinatior_ACREC</i>            | 13961                 | 8987                             |
| <i>Actinoplanes_missouriensis_ACTM4</i>       | 8112                  | 5416                             |
| <i>Actinoplanes_sp_ACTS5</i>                  | 8248                  | 5201                             |
| <i>Actinoplanes_utahensis_ACTUT</i>           | 7274                  | 4848                             |
| <i>Actinosynnema_mirum_ACTMD</i>              | 6911                  | 4596                             |
| <i>Acyrtosiphon_pisum_ACYPI</i>               | 35809                 | 22455                            |
| <i>Aedes_aegypti_AEDAE</i>                    | 15585                 | 12643                            |
| <i>Aedes_albopictus_AEDAL</i>                 | 17088                 | 13482                            |
| <i>Aeromonas_hydrophila_AERHH</i>             | 4120                  | 3300                             |
| <i>Agaricus_bisporus_AGABU</i>                | 11203                 | 6319                             |
| <i>Agrilus_planipennis_AGRPL</i>              | 11583                 | 10069                            |
| <i>Agrobacterium_fabrum_AGRFC</i>             | 5343                  | 4040                             |
| <i>Agrobacterium_radiobacter_AGRRK</i>        | 6673                  | 5202                             |
| <i>Agrobacterium_vitis_AGRVS</i>              | 5352                  | 4037                             |
| <i>Ailuropoda_melanoleuca_AILME</i>           | 19343                 | 18972                            |
| <i>Ajellomyces_capsulatus_AJEC8</i>           | 9444                  | 5976                             |
| <i>Ajellomyces_capsulatus_AJECG</i>           | 9213                  | 6012                             |
| <i>Ajellomyces_capsulatus_AJECH</i>           | 9544                  | 5924                             |
| <i>Ajellomyces_capsulatus_AJECN</i>           | 9251                  | 6274                             |
| <i>Ajellomyces_dermatitidis_AJEDR</i>         | 9744                  | 6151                             |
| <i>Alcanivorax_dieselolei_ALCDB</i>           | 4387                  | 3418                             |
| <i>Alicyclophilus_denitrificans_ALIDK</i>     | 4619                  | 3548                             |
| <i>Alicyclobacillus_acidoterrestris_ALIAG</i> | 4101                  | 2845                             |
| <i>Alkaliphilus_metalliredigens_ALKMQ</i>     | 4466                  | 2995                             |
| <i>Alligator_mississippiensis_ALLMI</i>       | 24655                 | 18326                            |
| <i>Alligator_sinensis_ALLSI</i>               | 18577                 | 18283                            |
| <i>Alternaria_alternata_ALTAL</i>             | 13462                 | 9411                             |
| <i>Alteromonas_naphthalenivorans_ALTNA</i>    | 4341                  | 2981                             |
| <i>Amazona_aestiva_AMAAE</i>                  | 16091                 | 14421                            |
| <i>Amborella_trichopoda_AMBTC</i>             | 27358                 | 18958                            |
| <i>Amphimedon_queenslandica_AMPQE</i>         | 43434                 | 22636                            |

|                                     |       |       |
|-------------------------------------|-------|-------|
| Amycolatopsis_mediterranei_AMYMS    | 9550  | 6547  |
| Anabaena_cylindrica_ANACC           | 5796  | 3571  |
| Anaeromyxobacter_dehalogenans_ANADE | 4344  | 3032  |
| Anaeromyxobacter_sp_ANADF           | 4460  | 3112  |
| Ananas_comosus_ANACO                | 23407 | 21730 |
| Anas_platyrhynchos_ANAPL            | 15658 | 14812 |
| Aneurinibacillus_migulanus_ANEMI    | 5647  | 3790  |
| Angiostrongylus_cantonensis_ANGCA   | 14485 | 9491  |
| Angiostrongylus_costaricensis_ANGCS | 13377 | 9137  |
| Anisakis_simplex_ANISI              | 20760 | 12284 |
| Anopheles_albimanus_ANOAL           | 12280 | 9405  |
| Anopheles_arabiensis_ANOAR          | 13720 | 9875  |
| Anopheles_darlingi_ANODA            | 10446 | 9125  |
| Anopheles_funestus_ANOFN            | 13682 | 10221 |
| Anopheles_merus_ANOME               | 13302 | 9778  |
| Anopheles_quadriannulatus_ANOQN     | 13717 | 10269 |
| Anopheles_sinensis_ANOSI            | 19342 | 10186 |
| Anopheles_stephensi_ANOST           | 23125 | 18133 |
| Antrostomus_carolinensis_ANTCR      | 8956  | 8346  |
| Apaloderma_vittatum_APAVI           | 7902  | 7477  |
| Apis_mellifera_APIME                | 15322 | 9803  |
| Aptenodytes_forsteri_APTFO          | 13703 | 12890 |
| Arabidopsis_lyrata_ARALL            | 32048 | 26856 |
| Arabis_alpina_ARAAL                 | 21573 | 18027 |
| Aromatoleum_aromaticum_AROAE        | 4482  | 2915  |
| Arthrobacter_sp_ARTS2               | 4452  | 3289  |
| Arthrotrys_oligospora_ARTOA         | 11477 | 7179  |
| Arthroderma_benhamiae_ARTBC         | 7975  | 5918  |
| Arthroderma_gypseum_ARTGP           | 8920  | 6484  |
| Arthroderma_otae_ARTOC              | 8763  | 6483  |
| Arthrospira_platensis_ARTPN         | 6008  | 3140  |
| Ascaris_lumbricoides_ASCLU          | 18552 | 8489  |
| Ascaris_suum_ASCSU                  | 9212  | 6576  |
| Aspergillus_carbonarius_ASPC5       | 11033 | 8755  |
| Aspergillus_clavatus_ASACL          | 9139  | 7468  |
| Aspergillus_flavus_ASFPA            | 8430  | 7056  |
| Aspergillus_flavus_ASFPN            | 13499 | 10123 |
| Aspergillus_kawachii_ASPKW          | 11487 | 9151  |
| Aspergillus_niger_ASPNA             | 10946 | 8950  |
| Aspergillus_niger_ASPNC             | 14067 | 9275  |
| Aspergillus_niger_ASPNG             | 10372 | 8662  |
| Aspergillus_oryzae_ASPOR            | 12069 | 9479  |
| Aspergillus_oryzae_ASPOZ            | 11428 | 9454  |

|                                      |       |       |
|--------------------------------------|-------|-------|
| Aspergillus_parasiticus_ASPPU        | 8650  | 7361  |
| Aspergillus_terreus_ASPTN            | 10416 | 8439  |
| Astyanax_mexicanus_ASTMX             | 23015 | 22584 |
| Atta_cephalotes_ATTCE                | 10482 | 9239  |
| Aureococcus_anophagefferens_AURAN    | 11500 | 8494  |
| Auricularia_subglabra_AURST          | 5289  | 1433  |
| Auxenochlorella_protothecoides_AUXPR | 6998  | 5168  |
| Azorhizobium_caulinodans_AZOC5       | 4707  | 3655  |
| Azospirillum_lipoferum_AZOL4         | 6061  | 4228  |
| Azospirillum_lipoferum_AZOLI         | 6617  | 4844  |
| Azospirillum_sp_AZOS1                | 6091  | 4704  |
| Azotobacter_vinelandii_AZOVD         | 4989  | 3578  |
| Babesia_bigemina_BABBI               | 4431  | 2255  |
| Bacillus_akibai_BACA3                | 4709  | 3295  |
| Bacillus_anthraxis_BACAN             | 5489  | 3541  |
| Bacillus_atrophaeus_BACA1            | 4185  | 2883  |
| Bacillus_badius_BACBA                | 4478  | 2736  |
| Bacillus_cellulosilyticus_BACCJ      | 4252  | 2820  |
| Bacillus_circulans_BACCI             | 4948  | 3567  |
| Bacillus_clausii_BACSK               | 4081  | 3092  |
| Bacillus_halodurans_BACHD            | 4005  | 2899  |
| Bacillus_licheniformis_BACLD         | 4163  | 2996  |
| Bacillus_megaterium_BACMQ            | 5605  | 3843  |
| Bacillus_pseudofirmus_BACPE          | 4309  | 2810  |
| Bacteroides_fragilis_BACFN           | 4233  | 2669  |
| Baudoinia_compniacensis_BAUCO        | 10507 | 6971  |
| Beauveria_bassiana_BEAB2             | 10362 | 7882  |
| Beutenbergia_cavernae_BEUC1          | 4194  | 3139  |
| Biomphalaria_glabrata_BIOGL          | 30874 | 314   |
| Blastococcus_saxobsidens_BLASD       | 4790  | 3205  |
| Blastocystis_hominis_BLAHO           | 5819  | 4171  |
| Blastocystis_sp_BLAHN                | 6376  | 4796  |
| Blastomyces_gilchristii_BLAGS        | 9689  | 6188  |
| Blumeria_graminis_BLUG1              | 6485  | 4843  |
| Bodo_saltans_BODSA                   | 18123 | 7544  |
| Bombyx_mori_BOMMO                    | 14772 | 10474 |
| Bordetella_petrii_BORPD              | 4911  | 3830  |
| Botryosphaeria_parva_BOTPV           | 10364 | 8326  |
| Botryotinia_fuckeliana_BOTF1         | 11021 | 8099  |
| Botryotinia_fuckeliana_BOTF4         | 16337 | 8391  |
| Bradyrhizobium_elkanii_BRAEL         | 6819  | 5055  |
| Bradyrhizobium_sp_BRASO              | 6700  | 4716  |
| Brassica_napus_BRANA                 | 60064 | 48101 |

|                                    |       |       |
|------------------------------------|-------|-------|
| Brassica_rapa_BRARP                | 40800 | 36419 |
| Brevibacillus_brevis_BREBN         | 5886  | 4032  |
| Brevibacillus_choshinensis_BRECH   | 5615  | 4359  |
| Brugia_malayi_BRUMA                | 11317 | 8067  |
| Brugia_pahangi_BRUPA               | 14607 | 8898  |
| Burkholderia_cenocepacia_BURCJ     | 6992  | 5237  |
| Burkholderia_gladioli_BURGS        | 7350  | 5466  |
| Burkholderia_glumae_BURGB          | 5659  | 4203  |
| Burkholderia_multivorans_BURM1     | 6039  | 4582  |
| Burkholderia_pseudomallei_BURPS    | 5716  | 4317  |
| Burkholderia_sp_BURSG              | 5982  | 4663  |
| Burkholderia_vietnamiensis_BURVG   | 7408  | 4813  |
| Bursaphelenchus_xylophilus_BURXY   | 17485 | 10555 |
| Byssochlamys_spectabilis_BYSSN     | 8876  | 7402  |
| Caenorhabditis_brenneri_CAEBE      | 29978 | 20040 |
| Caenorhabditis_japonica_CAEJA      | 6178  | 4224  |
| Caenorhabditis_remanei_CAERE       | 31245 | 21808 |
| Cajanus_cajan_CAJCA                | 47179 | 40989 |
| Caldilinea_aerophila_CALAS         | 4096  | 3097  |
| Callipepla_squamata_CALSU          | 16972 | 16518 |
| Callithrix_jacchus_CALJA           | 20989 | 20292 |
| Calypte_anna_CALAN                 | 13266 | 12618 |
| Camelus_ferus_CAMFR                | 20002 | 17653 |
| Camponotus_floridanus_CAMFO        | 14786 | 9924  |
| Candida_glabrata_CANGA             | 5199  | 4316  |
| Candida_maltosa_CANMX              | 5975  | 4689  |
| Candida_parapsilosis_CANPC         | 5776  | 4786  |
| Candida_tenuis_CANTC               | 5539  | 4574  |
| Candida_tropicalis_CANTT           | 6225  | 4923  |
| Capsaspora_owczarzaki_CAPO3        | 8737  | 6915  |
| Capsicum_annuum_CAPAN              | 31185 | 28610 |
| Cariama_cristata_CARIC             | 8693  | 8270  |
| Catenulispora_acidiphila_CATAD     | 8908  | 5988  |
| Cathartes_aura_CATAU               | 7759  | 7292  |
| Caulobacter_segnis_CAUST           | 4135  | 3066  |
| Caulobacter_sp_CAUSK               | 5372  | 3734  |
| Caulobacter_vibrioides_CAUVI       | 4641  | 3291  |
| Cavia_porcellus_CAVPO              | 18253 | 18061 |
| Cellulophaga_algicola_CELAD        | 4113  | 2543  |
| Cellulosilyticum_lentocellum_CELLD | 4149  | 2742  |
| Cephalotus_follicularis_CEPFO      | 36276 | 27940 |
| Ceratocystis_fimbriata_CERFI       | 5619  | 4589  |
| Ceriporiopsis_subvermispora_CERS8  | 12076 | 6995  |

|                                      |       |       |
|--------------------------------------|-------|-------|
| Chaetomium_globosum_CHAGB            | 11041 | 7660  |
| Chaetomium_thermophilum_CHATD        | 7182  | 5786  |
| Chamaesiphon_minutus_CHAP6           | 5814  | 3442  |
| Charadrius_vociferus_CHAVO           | 14256 | 13287 |
| Chelativorans_sp_CHESB               | 4529  | 3287  |
| Chelonia_mydas_CHEMY                 | 18959 | 15901 |
| Chitinophaga_pinensis_CHIPD          | 7178  | 4581  |
| Chlorella_variabilis_CHLVA           | 9830  | 7835  |
| Chlorocebus_sabaeus_CHLSB            | 19140 | 18722 |
| Chondromyces_crocatus_CHOCO          | 8326  | 4666  |
| Chromobacterium_violaceum_CHRVO      | 4396  | 3206  |
| Cicer_arietinum_CICAR                | 24568 | 23526 |
| Ciona_savignyi_CIOSA                 | 11591 | 8953  |
| Citrobacter_koseri_CITK8             | 5018  | 3491  |
| Citrobacter_rodentium_CITRI          | 4791  | 3531  |
| Citrus_sinensis_CITSI                | 28131 | 25353 |
| Claviceps_purpurea_CLAP2             | 8813  | 6386  |
| Clavispora_lusitaniae_CLAL4          | 5931  | 4556  |
| Clonorchis_sinensis_CLOSI            | 13605 | 8746  |
| Clostridium_beijerinckii_CLOB8       | 5002  | 3712  |
| Clostridium_cellulovorans_CLOC7      | 4210  | 2888  |
| Clostridium_hungatei_CLOHU           | 4232  | 2868  |
| Clostridium_saccharolyticum_CLOSW    | 4132  | 2992  |
| Coccidioides_immitis_COCIM           | 9586  | 6155  |
| Coccidioides_posadasii_COCPS         | 10208 | 6232  |
| Coccomyxa_subellipsoidea_COCSA       | 9762  | 7147  |
| Cochliobolus_heterostrophus_COCH5    | 12851 | 8777  |
| Cochliobolus_sativus_COCSN           | 12173 | 8487  |
| Colinus_virginianus_COLVI            | 17121 | 16701 |
| Colius_striatus_COLST                | 7079  | 6656  |
| Colletotrichum_gloeosporioides_COLGC | 16387 | 11138 |
| Colletotrichum_gloeosporioides_COLGN | 15379 | 11537 |
| Colletotrichum_graminicola_COLGM     | 12018 | 8875  |
| Colletotrichum_higginsianum_COLHI    | 16109 | 10912 |
| Colletotrichum_orbiculare_COLOR      | 13345 | 9656  |
| Colletotrichum_sublineola_COLSU      | 12696 | 9175  |
| Collimonas_fungivorans_COLFT         | 4428  | 3447  |
| Colwellia_psychrerythraea_COLP3      | 4871  | 3243  |
| Comamonas_testosteroni_COMT2         | 4779  | 3658  |
| Conexibacter_woesei_CONWI            | 5911  | 4438  |
| Conidiobolus_coronatus_CONC2         | 10562 | 6396  |
| Coniosporium_apolloinis_CONA1        | 9305  | 7164  |
| Coprinopsis_cinerea_COPC7            | 13333 | 7140  |

|                                      |       |       |
|--------------------------------------|-------|-------|
| Corallococcus_coralloides_CORCM      | 8018  | 4757  |
| Cordyceps_militaris_CORMM            | 9650  | 7310  |
| Corvus_brachyrhynchos_CORBR          | 13620 | 12644 |
| Crassostrea_gigas_CRAGI              | 25945 | 17694 |
| Cricetulus_griseus_CRIGR             | 23880 | 18967 |
| Cronobacter_sakazakii_CROS8          | 4420  | 3164  |
| Cryptococcus_gattii_CRYGR            | 6470  | 5038  |
| Cryptococcus_gattii_CRYGW            | 6559  | 5111  |
| Cucumis_melo_CUCME                   | 19472 | 18898 |
| Cucumis_sativus_CUCSA                | 23743 | 19795 |
| Culex_quinquefasciatus_CULQU         | 18661 | 14660 |
| Cupriavidus_metallidurans_CUPMC      | 6363  | 4500  |
| Cupriavidus_necator_CUPNH            | 6613  | 5161  |
| Cupriavidus_necator_CUPNJ            | 6432  | 5041  |
| Cyanidioschyzon_merolae_CYAM1        | 4990  | 3925  |
| Cyanothece_sp_CYAA5                  | 5238  | 3176  |
| Cyanothece_sp_CYAP2                  | 6558  | 3877  |
| Cyanothece_sp_CYAP4                  | 5231  | 3318  |
| Cyanothece_sp_CYAP7                  | 5655  | 3487  |
| Cyanothece_sp_CYAP8                  | 4334  | 2914  |
| Cyberlindnera_fabianii_CYBFA         | 5506  | 4567  |
| Cyberlindnera_jadinii_CYBJA          | 5051  | 4013  |
| Cyclobacterium_marinum_CYCMS         | 4982  | 3223  |
| Dacryopinax_primogenitus_DACPD       | 10232 | 6517  |
| Dactylellina_haptotyla_DACHA         | 10958 | 7154  |
| Debaryomyces_hansenii_DEBHA          | 6283  | 4968  |
| Dechloromonas_aromatica_DECAR        | 4154  | 3046  |
| Deinococcus_gobiensis_DEIGI          | 4328  | 2647  |
| Deinococcus_peraridilitoris_DEIPD    | 4163  | 2735  |
| Delftia_acidovorans_DELAS            | 5967  | 4407  |
| Dendroctonus_ponderosae_DENPD        | 12068 | 9889  |
| Desulfatibacillum_alkenivorans_DESAA | 5197  | 3591  |
| Desulfitobacterium_hafniense_DESHY   | 5013  | 3732  |
| Desulfobacterium_autotrophicum_DESAH | 4845  | 3451  |
| Desulfobacula_toluolica_DESTT        | 4188  | 3060  |
| Desulfomonile_tiedjei_DESTA          | 5411  | 3499  |
| Desulfosporosinus_acidiphilus_DESAJ  | 4468  | 3059  |
| Desulfosporosinus_meridiei_DESMD     | 4339  | 3076  |
| Desulfosporosinus_orientis_DESOD     | 5216  | 3796  |
| Desulfotomaculum_acetoxidans_DESAS   | 4015  | 2508  |
| Desulfovibrio_magneticus_DESMR       | 4662  | 3011  |
| Diaphorina_citri_DIACI               | 18135 | 13704 |
| Dichomitus_squalens_DICSQ            | 7182  | 3886  |

|                                   |       |       |
|-----------------------------------|-------|-------|
| Dickeya_dadantii_DICD3            | 4531  | 3393  |
| Dictyocaulus_viviparus_DICVI      | 14160 | 9792  |
| Dictyostelium_fasciculatum_DICFS  | 12151 | 7909  |
| Didymella_rabiei_DIDRA            | 10557 | 8004  |
| Dinoroseobacter_shibae_DINSH      | 4085  | 2948  |
| Dipodomys_ordii_DIPOR             | 19727 | 19480 |
| Dothistroma_septosporum_DOTSN     | 12398 | 7966  |
| Dracunculus_medinensis_DRAME      | 10897 | 7939  |
| Drosophila_ananassae_DROAN        | 14147 | 11187 |
| Drosophila_busckii_DROBS          | 11913 | 10162 |
| Drosophila_ficusphila_DROFC       | 15030 | 12113 |
| Drosophila_grimshawi_DROGR        | 14688 | 11333 |
| Drosophila_mojavensis_DROMO       | 13296 | 10777 |
| Drosophila_persimilis_DROPE       | 16736 | 11809 |
| Drosophila_pseudoobscura_DROPS    | 14388 | 11229 |
| Drosophila_sechellia_DROSE        | 16096 | 11660 |
| Drosophila_simulans_DROSI         | 15343 | 10952 |
| Drosophila_virilis_DROVI          | 13485 | 10901 |
| Drosophila_willistoni_DROWI       | 13593 | 11081 |
| Dryobates_pubescens_DRYPU         | 13096 | 12216 |
| Dyadobacter_fermentans_DYAFD      | 5702  | 3813  |
| Echinicola_vietnamensis_ECHVK     | 4508  | 2943  |
| Echinococcus_granulosus_ECHGR     | 11278 | 6698  |
| Echinococcus_multilocularis_ECHMU | 10471 | 7085  |
| Ectocarpus_siliculosus_ECTSI      | 16333 | 9889  |
| Edhazardia_aedis_EDHAE            | 4188  | 1273  |
| Egretta_garzetta_EGRGA            | 13488 | 12691 |
| Eimeria_acervulina_EIMAC          | 6866  | 3802  |
| Eimeria_maxima_EIMMA              | 6056  | 3220  |
| Eimeria_tenella_EIMTE             | 8594  | 3831  |
| Emiliana_huxleyi_EMIHU            | 35675 | 18770 |
| Emticicia_oligotrophica_EMTOG     | 4250  | 2947  |
| Endocarpon_pusillum_ENDPU         | 9227  | 6747  |
| Enterobacter_lignolyticus_ENTLS   | 4392  | 3583  |
| Enterobacter_sp_ENT38             | 4235  | 3348  |
| Enterobius_vermicularis_ENTVE     | 12868 | 8691  |
| Eremothecium_cymbalariae_EREKY    | 4428  | 3744  |
| Erinaceus_europaeus_ERIEU         | 19241 | 19074 |
| Erwinia_billingiae_ERWBE          | 4914  | 3831  |
| Erythranthe_guttata_ERYGU         | 27702 | 25879 |
| Eubacterium_limosum_EUBLK         | 4505  | 2680  |
| Eucalyptus_grandis_EUCGR          | 36663 | 31518 |
| Euroglyphus_maynei_EURMA          | 15245 | 9595  |

|                                 |       |       |
|---------------------------------|-------|-------|
| Eurypyga_helias_EURHL           | 7978  | 7472  |
| Eutrema_salsugineum_EUTSA       | 26425 | 24632 |
| Eutypa_lata_EUTLA               | 11683 | 8986  |
| Exophiala_dermatitidis_EXODN    | 9284  | 7267  |
| Ficedula_albicollis_FICAL       | 15289 | 14497 |
| Fistulifera_solaris_FISSO       | 20300 | 13241 |
| Flavobacterium_johnsoniae_FLAJ1 | 5015  | 3147  |
| Flavobacterium_sp_FLASC         | 4318  | 2733  |
| Fluviicola_taffensis_FLUTR      | 4015  | 2178  |
| Folsomia_candida_FOLCA          | 28564 | 15769 |
| Fomitopsis_pinicola_FOMPI       | 13804 | 7630  |
| Frankia_alni_FRAAA              | 6676  | 4123  |
| Frankia_casuarinae_FRACC        | 4440  | 2864  |
| Frankia_inefficax_FRAIE         | 7078  | 5069  |
| Frankia_sp_FRASN                | 7132  | 4805  |
| Frankia_symbiont_FRADG          | 4062  | 2677  |
| Fukomys_damarensis_FUKDA        | 20404 | 17674 |
| Fulmarus_glacialis_FULGA        | 8114  | 7676  |
| Fusarium_langsethiae_FUSLA      | 11938 | 8910  |
| Fusarium_oxysporum_FUSC1        | 15354 | 11177 |
| Fusarium_oxysporum_FUSC4        | 14156 | 10313 |
| Fusarium_oxysporum_FUSO4        | 16635 | 11500 |
| Fusarium_oxysporum_FUSOF        | 17783 | 12224 |
| Fusarium_poeae_FUSPO            | 14047 | 10297 |
| Gaeumannomyces_graminis_GAGT3   | 14187 | 8212  |
| Galdieria_sulphuraria_GALSU     | 6594  | 4752  |
| Gasterosteus_aculeatus_GASAC    | 20665 | 19454 |
| Gavia_stellata_GAVST            | 7729  | 7361  |
| Geobacillus_sp_GEOS4            | 6236  | 4654  |
| Geobacter_bemidjiensis_GEOBB    | 4041  | 2940  |
| Geobacter_sp_GEOS8              | 4405  | 3111  |
| Geobacter_uraniireducens_GEOUR  | 4254  | 3105  |
| Geodermatophilus_obscurus_GEOOG | 4794  | 3314  |
| Gibberella_fujikuroi_GIBF5      | 14791 | 10906 |
| Gibberella_moniliformis_GIBM7   | 15888 | 10963 |
| Gibberella_zeae_GIBZE           | 14159 | 9418  |
| Glarea_lozoyensis_GLAL2         | 13081 | 9105  |
| Glarea_lozoyensis_GLAL7         | 7925  | 5038  |
| Globodera_pallida_GLOPA         | 16265 | 9206  |
| Gloeophyllum_trabeum_GLOTA      | 11734 | 7294  |
| Glossina_austeni_GLOAU          | 19639 | 11355 |
| Glossina_fuscipes_GLOFF         | 20020 | 11489 |
| Glossina_morsitans_GLOMM        | 12515 | 9717  |



|                                      |       |       |
|--------------------------------------|-------|-------|
| Glossina_pallidipes_GLOPL            | 19249 | 10603 |
| Glycine_soja_GLYSO                   | 26095 | 23337 |
| Gonium_pectorale_GONPE               | 16223 | 10154 |
| Gordonia_bronchialis_GORB4           | 4627  | 3201  |
| Gordonia_polyisoprenivorans_GORPV    | 5096  | 3710  |
| Gossypium_arboreum_GOSAR             | 30419 | 17587 |
| Gossypium_hirsutum_GOSHI             | 60810 | 57607 |
| Gossypium_raimondii_GOSRA            | 38036 | 34471 |
| Granulicella_mallensis_GRAMM         | 4803  | 3249  |
| Granulicella_tundricola_GRATM        | 4513  | 2915  |
| Gregarina_niphandrodes_GRENI         | 6340  | 2665  |
| Grifola_froncosa_GRIFR               | 14984 | 7099  |
| Grosmannia_clavigera_GROCL           | 8310  | 6635  |
| Haemonchus_contortus_HAECO           | 21200 | 14455 |
| Haemonchus_placei_HAEPC              | 21888 | 12057 |
| Hahella_chejuensis_HAHCH             | 6750  | 4073  |
| Haliaeetus_albicilla_HALAL           | 8356  | 7831  |
| Haliangium_ochraceum_HALO1           | 6683  | 4030  |
| Halicomenobacter_hydrossis_HALH1     | 6703  | 4054  |
| Haloarcula_marismortui_HALMA         | 4233  | 2418  |
| Halobacillus_halophilus_HALH3        | 4099  | 2753  |
| Halomonas_anticariensis_HALAF        | 4704  | 3594  |
| Halomonas_elongata_HALEL             | 4640  | 3451  |
| Halopiger_xanaduensis_HALXS          | 4220  | 2489  |
| Haloterrigena_turkmenica_HALTV       | 5112  | 3031  |
| Hammondia_hammondi_HAMHA             | 8001  | 4334  |
| Handelsmanbacteria_sp_HANXR          | 5363  | 3584  |
| Harpegnathos_saltator_HARSA          | 15028 | 9691  |
| Helianthus_annuus_HELAN              | 51239 | 40770 |
| Heligmosomoides_polygyrus_HELBK      | 23051 | 10161 |
| Herbaspirillum_seropedicae_HERSS     | 4731  | 3730  |
| Herpetosiphon_aurantiacus_HERA2      | 5253  | 3459  |
| Heterocephalus_glaber_HETGA          | 21444 | 20799 |
| Heterorhabditis_bacteriophora_HETBA  | 20832 | 8364  |
| Hoeflea_phototrophica_HOEPD          | 4184  | 3137  |
| Hordeum_vulgare_HORVV                | 35916 | 30650 |
| Hoyosella_subflava_HOYSD             | 4702  | 3254  |
| Hyaloperonospora_arabidopsidis_HYAAE | 13835 | 6691  |
| Hydatigena_teniaeformis_HYDTA        | 11627 | 7383  |
| Hymenolepis_diminuta_HYMDI           | 11246 | 7574  |
| Hymenolepis_microstoma_HYMMI         | 11999 | 7297  |
| Hymenolepis_nana_HYMNN               | 13721 | 8289  |
| Hyphomicrobium_sp_HYPSM              | 4888  | 2972  |

|                                     |       |       |
|-------------------------------------|-------|-------|
| Hypocrea_atroviridis_HYPAL          | 11769 | 8693  |
| Hypocrea_jecorina_HYPJQ             | 9111  | 7255  |
| Hypocrea_virens_HYPVG               | 12382 | 9382  |
| Hypsibius_dujardini_HYPDU           | 14161 | 8973  |
| Hypsizygus_marmoreus_HYPMA          | 15518 | 7533  |
| Ichthyophthirius_multifiliis_ICHMG  | 8048  | 5811  |
| Ictidomys_tridecemlineatus ICTTR    | 18445 | 18258 |
| Ideonella_sakaiensis_IDESA          | 5526  | 3957  |
| Jannaschia_sp_JANSC                 | 4270  | 3053  |
| Jatropha_curcas_JATCU               | 27057 | 20501 |
| Kalmanozyma_brasiliensis_KALBG      | 5764  | 4924  |
| Kazachstania_africana_KAZAF         | 5353  | 4432  |
| Kazachstania_naganishii_KAZNA       | 5300  | 4397  |
| Kibdelosporangium_aridum_KIBAR      | 11139 | 7575  |
| Kineococcus_radiotolerans_KINRD     | 4673  | 3243  |
| Kitasatospora_aureofaciens_KITAU    | 7619  | 5097  |
| Kitasatospora_griseola_KITGR        | 5874  | 3994  |
| Kitasatospora_setae_KITSK           | 7442  | 4849  |
| Klebsiella_aerogenes_KLEAK          | 4908  | 3897  |
| Klebsiella_pneumoniae_KLEP7         | 5125  | 4105  |
| Klebsormidium_flaccidum_KLEFL       | 16170 | 11098 |
| Kluyvera_intermedia_KLUIN           | 5557  | 4126  |
| Kluyveromyces_lactis_KLULA          | 5070  | 4199  |
| Komagataella_phaffii_KOMPG          | 5072  | 4284  |
| Koribacter_versatilis_KORVE         | 4770  | 3186  |
| Kribbella_flavida_KRIFD             | 6939  | 4909  |
| Labrenzia_alexandrii_LABAD          | 5362  | 3682  |
| Laccaria_bicolor_LACBS              | 17894 | 7034  |
| Lachancea_fermentati_LACFM          | 5228  | 4425  |
| Lachancea_thermotolerans_LACTC      | 5092  | 4319  |
| Larimichthys_crocea_LARCR           | 12676 | 11679 |
| Lasius_niger_LASNI                  | 18043 | 11460 |
| Latimeria_chalumnae_LATCH           | 19567 | 19146 |
| Lechevalieria_aerocolonigenes_NOCAE | 8236  | 5512  |
| Leishmania_braziliensis_LEIBR       | 8083  | 4953  |
| Leishmania_infantum_LEIIN           | 8044  | 5003  |
| Lentinula_edodes_LENED              | 12045 | 7242  |
| Leptomonas_seymouri_LEPSE           | 8479  | 4891  |
| Leptosomus_discolor_LEPDC           | 9573  | 8954  |
| Leptosphaeria_maculans_LEPMJ        | 12607 | 7369  |
| Leptothrix_cholodnii_LEPCP          | 4342  | 3325  |
| Lingula_unguis_LINUN                | 30539 | 25796 |
| Loa_loa_LOALO                       | 12172 | 8143  |

|                                      |       |       |
|--------------------------------------|-------|-------|
| Lodderomyces_elongisporus_LODEL      | 5778  | 4617  |
| Lottia_gigantea_LOTGI                | 23572 | 16003 |
| Loxodonta_africana_LOXAF             | 20019 | 19835 |
| Lucilia_cuprina_LUCCU                | 14335 | 9482  |
| Lupinus_angustifolius_LUPAN          | 13930 | 12958 |
| Lutzomyia_longipalpis_LUTLO          | 10277 | 8474  |
| Lyngbya_sp_LYNBP                     | 6109  | 3720  |
| Lysobacter_enzymogenes_LYSEN         | 5513  | 3219  |
| Macaca_fascicularis_MACFA            | 17395 | 16757 |
| Macrophomina_phaseolina_MACPH        | 13800 | 9487  |
| Magnaporthe_oryzae_MAGO7             | 12674 | 7983  |
| Magnaportheiopsis_poae_MAGP6         | 11205 | 6828  |
| Magnetospirillum_magneticum_MAGSA    | 4513  | 2946  |
| Malassezia_globosa_MALGO             | 4272  | 3700  |
| Marinomonas_mediterranea_MARM1       | 4117  | 3121  |
| Marinomonas_sp_MARMS                 | 4415  | 3572  |
| Marssonina_brunnea_MARBU             | 10036 | 6906  |
| Medicago_truncatula_MEDTR            | 49963 | 35057 |
| Megaselia_scalaris_MEGSC             | 11460 | 6978  |
| Melampsora_larici_MELLP              | 16236 | 6705  |
| Meleagris_gallopavo_MELGA            | 14165 | 13987 |
| Meloidogyne_hapla_MELHA              | 14361 | 7606  |
| Merops_nubicus_MERNU                 | 7656  | 7290  |
| Mesocricetus_auratus_MESAU           | 20194 | 19956 |
| Mesorhizobium_ciceri_MESCW           | 6259  | 4531  |
| Metarhizium_acridum_METAQ            | 9829  | 7782  |
| Metarhizium_robertsii_METRA          | 11683 | 8857  |
| Methylbium_petroleiphilum_METPP      | 4358  | 3013  |
| Methylobacter_tundripaludum_METTV    | 4193  | 2808  |
| Methylobacterium_extorquens_METEA    | 6232  | 3533  |
| Methylobacterium_nodulans_METNO      | 8127  | 4606  |
| Methylobacterium_radiotolerans_METRJ | 6387  | 4143  |
| Methylobacterium_sp_METS4            | 6646  | 4369  |
| Methylocystis_sp_METSZ               | 4039  | 2477  |
| Methylomicrobium_alcaliphilum_META2  | 4040  | 2739  |
| Methylomonas_methanica_METMM         | 4434  | 2921  |
| Meyerozyma_guilliermondii_PICGU      | 5918  | 4915  |
| Microbotryum_lychnidis_USTV1         | 7353  | 5368  |
| Microcystis_aeruginosa_MICAN         | 5980  | 3133  |
| Microlunatus_phosphovorus_MICPN      | 5304  | 3576  |
| Micromonas_commoda_MICCC             | 10088 | 7304  |
| Micromonas_pusilla_MICPC             | 10245 | 7056  |
| Micromonospora_aurantiaca_MICAI      | 6203  | 4118  |

|                                       |       |       |
|---------------------------------------|-------|-------|
| Micromonospora_echinospora_MICEC      | 6414  | 4336  |
| Mixia_osmundae_MIXOS                  | 6724  | 4979  |
| Moniliophthora_ernsteri_MONPE         | 13648 | 6843  |
| Moniliophthora_roreri_MONRO           | 17971 | 9912  |
| Mucor_circinelloides_MUCC1            | 12142 | 8800  |
| Musa_acuminata_MUSAM                  | 36473 | 30353 |
| Musca_domestica_MUSDO                 | 14345 | 11900 |
| Mustela_putorius_MUSPF                | 19908 | 18415 |
| Myceliophthora_thermophila_MYCTT      | 9078  | 6703  |
| Mycobacterium_asiaticum_MYCAS         | 4762  | 3472  |
| Mycobacterium_celatum_MYCCE           | 4309  | 3156  |
| Mycobacterium_chubuense_MYCCN         | 5778  | 4041  |
| Mycobacterium_gordonae_MYCGO          | 6406  | 4477  |
| Mycobacterium_hassiacum_MYCHD         | 4958  | 3443  |
| Mycobacterium_kansasii_MYCKA          | 5034  | 3464  |
| Mycobacterium_malmoense_MYCMA         | 4970  | 3598  |
| Mycobacterium_marinum_MYCMM           | 5417  | 3934  |
| Mycobacterium_paraafortuitum_MYCPF    | 5682  | 4284  |
| Mycobacterium_paratuberculosis_MYCPA  | 4315  | 3234  |
| Mycobacterium_rhodesiae_MYCRN         | 6104  | 4322  |
| Mycobacterium_shimoidei_MYCSH         | 4325  | 3137  |
| Mycobacterium_sinense_MYCSD           | 4331  | 3028  |
| Mycobacterium_smegmatis_MYCS2         | 6600  | 4843  |
| Mycobacterium_sp_MYCSK                | 5892  | 4159  |
| Mycobacterium_thermoresistibile_MYCT3 | 4612  | 3321  |
| Mycobacterium_vanbaalenii_MYCVP       | 5901  | 4202  |
| Myotis_brandtii_MYOBR                 | 19242 | 18073 |
| Myotis_davidii_MYODS                  | 15445 | 14416 |
| Myotis_lucifugus_MYOLU                | 19661 | 19452 |
| Myxococcus_stipitatus_MYXSD           | 8042  | 4831  |
| Myxococcus_xanthus_MYXXD              | 7313  | 4329  |
| Naegleria_gruberi_NAAGR               | 15633 | 9005  |
| Nakamurella_multipartita_NAKMY        | 5122  | 3536  |
| Nasonia_vitripennis_NASVI             | 17018 | 11559 |
| Natrialba_asiatica_NATA1              | 4174  | 2539  |
| Natrialba_magadii_NATMM               | 4202  | 2414  |
| Natrinema_pellirubrum_NATP1           | 4137  | 2358  |
| Natrinema_sp_NATSJ                    | 4295  | 2107  |
| Naumovozya_castellii_NAUCC            | 5564  | 4565  |
| Naumovozya_dairenensis_NAUDC          | 5522  | 4549  |
| Necator_americanus_NECAM              | 19124 | 11745 |
| Nectria_haematococca_NECH7            | 15708 | 12025 |
| Nelumbo_nucifera_NELNU                | 23992 | 23350 |

|                                    |       |       |
|------------------------------------|-------|-------|
| Neosartorya_fischeri_NEOFI         | 10413 | 8423  |
| Neospora_caninum_NEOCL             | 7107  | 4133  |
| Neotoma_lepida_NEOLE               | 24273 | 22354 |
| Nestor_notabilis_NESNO             | 9136  | 8736  |
| Neurospora_tetrasperma_NEUT9       | 11176 | 6749  |
| Niastella_koreensis_NIAKG          | 7170  | 4497  |
| Nicotiana_attenuata_NICAT          | 20697 | 17311 |
| Nicotiana_sylvestris_NICSY         | 33639 | 30414 |
| Nicotiana_tabacum_TOBAC            | 61674 | 57395 |
| Nipponia_nippon_NIPNI              | 14131 | 13180 |
| Nippostrongylus_brasiliensis_NIPBR | 22657 | 13715 |
| Nitrobacter_hamburgensis_NITHX     | 4242  | 2606  |
| Nitrospira_moscoviensis_NITMO      | 4732  | 2731  |
| Nocardia_cyriacigeorgica_NOCCG     | 5472  | 3725  |
| Nocardia_farcinica_NOCFA           | 5940  | 3886  |
| Nocardioides_simplex_NOCSI         | 5425  | 3755  |
| Nocardioides_sp_NOCSJ              | 4887  | 3482  |
| Nocardiosis_alba_NOCAA             | 5499  | 3484  |
| Nocardiosis_dassonvillei_NOCCD     | 5496  | 3873  |
| Nomascus_leucogenys_NOMLE          | 18563 | 17768 |
| Nosema_bombycis_NOSB1              | 4397  | 1765  |
| Nostoc_punctiforme_NOSP7           | 6572  | 4225  |
| Nostoc_sp_NOSS1                    | 6069  | 3783  |
| Nostoc_sp_NOSS7                    | 5397  | 3508  |
| Ochrobactrum_anthropi_OCHA4        | 4756  | 3544  |
| Octopus_bimaculoides_OCTBM         | 32664 | 16764 |
| Oesophagostomum_dentatum_OESDE     | 25132 | 16607 |
| Ogataea_parapolyomorpha_OGAPD      | 5337  | 4561  |
| Oikopleura_dioica_OIKDI            | 17049 | 9816  |
| Onchocerca_ochengi_ONCOC           | 13341 | 8993  |
| Onchocerca_volvulus_ONCVO          | 12117 | 7700  |
| Ooceraea_biroi_OOCBI               | 16496 | 10333 |
| Ophiocordyceps_sinensis_OPHSC      | 6967  | 5095  |
| Ophiophagus_hannah_OPHHA           | 18386 | 15160 |
| Ophiostoma_piceae_OPHP1            | 8877  | 6958  |
| Opisthocomus_hoazin_OPIHO          | 12772 | 11510 |
| Opitutus_terrae_OPITP              | 4587  | 3124  |
| Orchesella_cincta_ORCCI            | 20217 | 14206 |
| Oreochromis_niloticus_ORENI        | 21435 | 21123 |
| Oryctolagus_cuniculus_RABIT        | 19904 | 19657 |
| Oryza_brachyantha_ORYBR            | 31988 | 23954 |
| Oryza_glaberrima_ORYGL             | 31806 | 25088 |
| Oryza_nivara_ORYNI                 | 36305 | 26317 |

|                                     |       |       |
|-------------------------------------|-------|-------|
| Oryza_punctata_ORYPU                | 31310 | 24910 |
| Oryza_rufipogon_ORYRU               | 37109 | 26559 |
| Oscillibacter_valericigenes_OSCVS   | 4592  | 2629  |
| Ostreococcus_lucimarinus_OSTLU      | 7389  | 5644  |
| Ostreococcus_tauri_OSTTA            | 7742  | 5812  |
| Otolemur_garnettii_OTOGA            | 19450 | 19303 |
| Ovis_aries_SHEEP                    | 21220 | 20688 |
| Paenarthrobacter_aurescens_PAEAT    | 4564  | 3308  |
| Paenibacillus_macerans_PAEMA        | 6550  | 4577  |
| Paenibacillus_polymyxa_PAEPS        | 5376  | 3632  |
| Paenibacillus_sp_PAESJ              | 6209  | 4761  |
| Pantoea_ananatis_PANAM              | 4240  | 3406  |
| Pantoea_sp_PANSA                    | 5759  | 4528  |
| Pantoea_vagans_PANVC                | 4589  | 3485  |
| Papilio_machaon_PAPMA               | 15460 | 11344 |
| Papilio_xuthus_PAPXU                | 15264 | 11134 |
| Papio_anubis_PAPAN                  | 19198 | 18808 |
| Paraburkholderia_caryophylli_PARCY  | 5784  | 4310  |
| Paraburkholderia_phymatum_PARP8     | 7460  | 5446  |
| Paraburkholderia_xenovorans_PARXL   | 8590  | 6308  |
| Paracoccidioides_brasiliensis_PARBD | 8398  | 5777  |
| Paracoccidioides_lutzii_PARBA       | 8810  | 5863  |
| Paracoccus_denitrificans_PARDP      | 5018  | 3671  |
| Parastrongyloides_trichosuri_PARTI  | 14866 | 9687  |
| Pectobacterium_atrosepticum_PECAS   | 4458  | 3405  |
| Pediculus_humanus_PEDHC             | 10753 | 8728  |
| Pedobacter_heparinus_PEDHD          | 4248  | 2958  |
| Pedosphaera_parvula_PEDPL           | 6491  | 3630  |
| Pelagibaca_bermudensis_PELBH        | 5419  | 3731  |
| Pelodiscus_sinensis_PELSI           | 18115 | 17709 |
| Penicillium_digitatum_PEND2         | 9100  | 6947  |
| Penicillium_expansum_PENEN          | 11059 | 8875  |
| Penicillium_italicum_PENIT          | 9992  | 7526  |
| Penicillium_nalgiovense_PENNA       | 11727 | 8460  |
| Penicillium_oxalicum_PENO1          | 9976  | 7213  |
| Penicillium_patulum_PENPA           | 9627  | 7900  |
| Penicillium_roqueforti_PENRF        | 12314 | 8239  |
| Penicillium_rubens_PENRW            | 12787 | 8798  |
| Perkinsus_marinus_PERM5             | 22957 | 11717 |
| Phaeodactylum_tricornutum_PHATC     | 10450 | 6978  |
| Phaethon_lepturus_PHALP             | 9151  | 8602  |
| Phalacrocorax_carbo_PHACA           | 8989  | 8611  |
| Phanerochaete_carnosa_PHACS         | 13866 | 7545  |

|                                            |       |       |
|--------------------------------------------|-------|-------|
| Phaseolus_angularis_PHAAN                  | 33729 | 25221 |
| Phaseolus_vulgaris_PHAVU                   | 28019 | 25888 |
| Phlebotomus_papatasi_PHLPP                 | 11187 | 9352  |
| Photobacterium_angustum_PHOAS              | 4551  | 3318  |
| Photobacterium_profundum_PHOPR             | 5327  | 3850  |
| Photorhabdus_luminescens_PHOLL             | 4555  | 2967  |
| Phycomyces_blakesleeenanus_PHYB8           | 16153 | 8336  |
| Phytophthora_infestans_PHYIT               | 17608 | 11035 |
| Phytophthora_nicotianae_PHYNI              | 15886 | 10673 |
| Phytophthora_parasitica_PHYPN              | 23003 | 11709 |
| Phytophthora_sojae_PHYSP                   | 25720 | 12789 |
| Picea_glauca_PICGL                         | 6154  | 201   |
| Pichia_kudriavzevii_PICKU                  | 6872  | 4643  |
| Pichia_sorbitophila_PICSO                  | 8850  | 7232  |
| Pirellula_staley_i_PIRSD                   | 4710  | 2805  |
| Planctopirus_limnophila_PLAL2              | 4257  | 2444  |
| Plasmodiophora_brassicae_PLABS             | 9719  | 6684  |
| Plasmodium_berghei_PLABA                   | 11655 | 3467  |
| Plasmodium_berghei_PLABE                   | 5059  | 2894  |
| Plasmodium_chabaudi_PLACH                  | 14613 | 3916  |
| Plasmodium_fragile_PLAFR                   | 5637  | 3036  |
| Plasmodium_gonderi_PLAGO                   | 5914  | 3031  |
| Plasmodium_knowlesi_PLAKH                  | 5099  | 2990  |
| Plasmodium_malariae_PLAMA                  | 6338  | 2863  |
| Plasmodium_vivax_PLAVS                     | 5388  | 3060  |
| Plasmodium_yoelii_PLAYO                    | 7740  | 2846  |
| Pluralibacter_gergoviae_PLUGE              | 4976  | 4004  |
| Podospora_anserina_PODAN                   | 10656 | 7951  |
| Poecilia_formosa_POEFO                     | 23407 | 22776 |
| Polaromonas_naphthalenivorans_POLNA        | 4878  | 3376  |
| Polaromonas_sp_POLSJ                       | 5436  | 4000  |
| Polymorphum_gilvum_POLGS                   | 4353  | 3175  |
| Polysphondylium_pallidum_POLPP             | 12350 | 8309  |
| Pongo_abelii_PONAB                         | 22000 | 20570 |
| Postia_placenta_POSPM                      | 8982  | 3943  |
| Prunus_persica_PRUPE                       | 26845 | 23713 |
| Pseudarthrobacter_chlorophenolicus_PSECP   | 4586  | 3107  |
| Pseudarthrobacter_phenanthrenivorans_PSEPM | 4080  | 2987  |
| Pseudoalteromonas_atlantica_PSEA6          | 4270  | 3243  |
| Pseudoalteromonas_piscicida_PSEO7          | 4133  | 2984  |
| Pseudocercospora_fijiensis_PSEFD           | 13042 | 8107  |
| Pseudocohnilembus_persalinus_PSEPJ         | 13174 | 7153  |
| Pseudogymnoascus_destructans_PSED2         | 9072  | 6344  |

|                                           |       |       |
|-------------------------------------------|-------|-------|
| <i>Pseudomonas_agarici_PSEAA</i>          | 4625  | 3483  |
| <i>Pseudomonas_alcaligenes_PSEA4</i>      | 4527  | 3265  |
| <i>Pseudomonas_entomophila_PSEE4</i>      | 5125  | 3881  |
| <i>Pseudomonas_fluorescens_PSEF5</i>      | 6107  | 4686  |
| <i>Pseudomonas_fluorescens_PSEFS</i>      | 6387  | 4637  |
| <i>Pseudomonas_fulva_PSEF1</i>            | 4458  | 3519  |
| <i>Pseudomonas_knackmussii_PSEKB</i>      | 5615  | 4251  |
| <i>Pseudomonas_mendocina_PSEMY</i>        | 4562  | 3572  |
| <i>Pseudomonas_putida_PSEPK</i>           | 5526  | 4116  |
| <i>Pseudomonas_putida_PSEPU</i>           | 5174  | 3895  |
| <i>Pseudomonas_stutzeri_PSEST</i>         | 4144  | 3348  |
| <i>Pseudomonas_stutzeri_PSEU5</i>         | 4091  | 3211  |
| <i>Pseudomonas_syringae_PSESM</i>         | 5430  | 3910  |
| <i>Pseudomonas_syringae_PSESX</i>         | 4833  | 3767  |
| <i>Pseudonocardia_dioxanivorans_PSEUX</i> | 6619  | 4766  |
| <i>Pseudonocardia_thermophila_PSETH</i>   | 5849  | 4334  |
| <i>Pseudoceanicola_batsensis_PSEBH</i>    | 4192  | 3036  |
| <i>Pseudovibrio_sp_PSEUV</i>              | 5455  | 3847  |
| <i>Pseudozyma_antarctica_PSEA2</i>        | 4671  | 3584  |
| <i>Pseudozyma_antarctica_PSEA3</i>        | 6542  | 5231  |
| <i>Pseudozyma_hubeiensis_PSEHS</i>        | 7471  | 5162  |
| <i>Pteropus_alecto_PTEAL</i>              | 19519 | 17914 |
| <i>Puccinia_triticina_PUCT1</i>           | 14859 | 7797  |
| <i>Punica_granatum_PUNGR</i>              | 28976 | 21374 |
| <i>Pycnoporus_cinnabarinus_PYCCI</i>      | 10179 | 6770  |
| <i>Pygoscelis_adeliae_PYGAD</i>           | 12847 | 12018 |
| <i>Pyrenophora_teres_PYRTT</i>            | 11704 | 8215  |
| <i>Pyrenophora_tritici_PYRTR</i>          | 12061 | 8088  |
| <i>Pyronema_omphalodes_PYROM</i>          | 13305 | 6666  |
| <i>Rahnella_aquaticus_RAHAC</i>           | 4840  | 3809  |
| <i>Ralstonia_pickettii_RALPJ</i>          | 4889  | 3540  |
| <i>Ralstonia_solanacearum_RALSO</i>       | 5001  | 3510  |
| <i>Ramazzottius_varieornatus_RAMVA</i>    | 22939 | 11655 |
| <i>Raoultella_ornithinolytica_RAOOR</i>   | 4873  | 4128  |
| <i>Reticulomyxa_filosa_RETFI</i>          | 39902 | 14527 |
| <i>Rhizobium_etli_RHIEC</i>               | 5917  | 4407  |
| <i>Rhizobium_lotii_RHILI</i>              | 5897  | 4118  |
| <i>Rhizobium_lotii_RHILO</i>              | 7254  | 5011  |
| <i>Rhizobium_meliloti_RHIME</i>           | 6168  | 4657  |
| <i>Rhizophagus_irregularis_RHIID</i>      | 29837 | 10861 |
| <i>Rhizopus_delemar_RHIO9</i>             | 16970 | 10105 |
| <i>Rhodnius_prolixus_RHOPR</i>            | 15182 | 10412 |
| <i>Rhodobacter_sphaeroides_RHOS4</i>      | 4284  | 3045  |



|                                       |       |       |
|---------------------------------------|-------|-------|
| Rhodococcus_erythropolis_RHOE4        | 6423  | 4604  |
| Rhodococcus_jostii_RHOJR              | 9074  | 6134  |
| Rhodoferax_ferrireducens_RHOFT        | 4400  | 3347  |
| Rhodopseudomonas_palustris_RHOPA      | 4810  | 3609  |
| Rhodopseudomonas_palustris_RHOPB      | 4863  | 3436  |
| Rhodopseudomonas_palustris_RHOPL      | 5579  | 3987  |
| Rhodospiridium_toruloides_RHOT1       | 8137  | 5806  |
| Rhodotorula_graminis_RHOGW            | 7224  | 5403  |
| Rhodovulum_sulfidophilum_RHOSU        | 4358  | 2994  |
| Ricinus_communis_RICCO                | 31218 | 23171 |
| Roseiflexus_sp_ROSS1                  | 4493  | 3232  |
| Rosellinia_necatrix_ROSNE             | 12439 | 8858  |
| Roseobacter_denitrificans_ROSDO       | 4117  | 2966  |
| Rubinisphaera_brasiliensis_RUBBR      | 4709  | 2861  |
| Rubrivivax_gelatinosus_RUBGI          | 4685  | 3502  |
| Ruegeria_pomeroyi_RUEPO               | 4268  | 3300  |
| Runella_slithyformis_RUNSL            | 5749  | 3661  |
| Saccharopolyspora_erythraea_SACEN     | 7153  | 5125  |
| Saccharothrix_espanaensis_SACES       | 8422  | 5325  |
| Salinispora_tropica_SALTO             | 4521  | 3146  |
| Salmo_salar_SALSA                     | 47718 | 45303 |
| Salmonella_arizonae_SALAR             | 4499  | 3227  |
| Salpingoeca_rosetta_SALR5             | 11613 | 8498  |
| Saprolegnia_parasitica_SAPPC          | 20051 | 12488 |
| Saprospira_grandis_SAPGL              | 4217  | 1869  |
| Sarcophilus_harrisii_SARHA            | 18780 | 17968 |
| Sarcoptes_scabiei_SARSC               | 10467 | 7197  |
| Scheffersomyces_stipitis_PICST        | 5796  | 4885  |
| Schistocephalus_solidus_SCHSO         | 20214 | 10335 |
| Schistosoma_haematobium_SCHHA         | 11118 | 8046  |
| Schistosoma_mansoni_SCHMA             | 10724 | 7561  |
| Schizophyllum_commune_SCHCM           | 13123 | 7268  |
| Schizosaccharomyces_cryophilus_SCHCR  | 5134  | 4377  |
| Schizosaccharomyces_japonicus_SCHJY   | 4851  | 4195  |
| Sebaldella_terminidis_SEBTE           | 4123  | 2480  |
| Sediminispirochaeta_smaragdinae_SEDSS | 4210  | 3188  |
| Selaginella_moellendorffii_SELML      | 32881 | 27005 |
| Serendipita_indica_SERID              | 11779 | 6726  |
| Serpula_lacrymans_SERL3               | 14338 | 6716  |
| Serratia_fonticola_SERFO              | 5085  | 4043  |
| Serratia_proteamaculans_SERP5         | 4929  | 3966  |
| Serratia_sp_SERS3                     | 4406  | 3503  |
| Setaria_italica_SETIT                 | 35699 | 28349 |

|                                      |       |       |
|--------------------------------------|-------|-------|
| Setosphaeria_turcica_SETT2           | 11686 | 8290  |
| Shewanella_pealeana_SHEPA            | 4180  | 3150  |
| Shewanella_violacea_SHEVD            | 4335  | 2936  |
| Shewanella_woodyi_SHEWM              | 4864  | 3513  |
| Singulisphaera_acidiphila_SINAD      | 7125  | 4201  |
| Sinorhizobium_fredii_SINFN           | 6273  | 4598  |
| Sinorhizobium_saheli_SINSA           | 5289  | 3944  |
| Solanum_tuberosum_SOLTU              | 39132 | 27677 |
| Solenopsis_invicta_SOLIN             | 13579 | 8713  |
| Solibacter_usitatus_SOLUE            | 7760  | 5121  |
| Solitalea_canadensis_SOLCM           | 4303  | 2796  |
| Sorangium_cellulosum_SORC5           | 9319  | 5416  |
| Sordaria_macrospora_SORMK            | 9889  | 7228  |
| Sorghum_bicolor_SORBI                | 33939 | 27193 |
| Spathaspora_passalidarum_SPAPN       | 5972  | 4814  |
| Sphaerulina_musiva_SPHMS             | 10153 | 7213  |
| Sphingobacterium_sp_SPHS2            | 5131  | 3589  |
| Sphingobium_japonicum_SPHJU          | 4346  | 2752  |
| Sphingomonas_wittichii_SPHWW         | 5312  | 3892  |
| Sphingopyxis_macrogoltabida_SPHMC    | 4439  | 3025  |
| Sphingopyxis_sp_SPHS1                | 4364  | 2947  |
| Spinacia_oleracea_SPIOL              | 21532 | 18179 |
| Spirosoma_linguale_SPILD             | 6866  | 4308  |
| Sporisorium_reilianum_SPORE          | 6672  | 5347  |
| Sporosarcina_psychrophila_SPOPS      | 4218  | 3024  |
| Sporothrix_schenckii_SPOS1           | 8672  | 7065  |
| Stachybotrys_chlorohalonata_STAC4    | 10675 | 8134  |
| Stackebrandtia_nassauensis_STANL     | 6378  | 4305  |
| Stanieria_cyanosphaera_STAC7         | 4750  | 3180  |
| Starkeya_novella_STAND               | 4423  | 3365  |
| Stigmatella_aurantiaca_STIAD         | 8306  | 4975  |
| Stomoxys_calcitrans_STOCA            | 13975 | 11700 |
| Streptoalloteichus_hindustanus_STRHI | 6532  | 4330  |
| Streptomyces_albulus_STRA9           | 8068  | 5474  |
| Streptomyces_albus_STRA4             | 7321  | 4710  |
| Streptomyces_atratus_STRAR           | 7606  | 5015  |
| Streptomyces_avermitilis_STRAW       | 7671  | 5277  |
| Streptomyces_bingchenggensis_STRBB   | 10018 | 6855  |
| Streptomyces_cattleya_STREN          | 7536  | 4735  |
| Streptomyces_clavuligerus_STRC2      | 7289  | 4549  |
| Streptomyces_collinus_STRC3          | 6681  | 4683  |
| Streptomyces_fradiae_STRFR           | 6178  | 4209  |
| Streptomyces_glaucescens_STRGA       | 6549  | 4593  |

|                                      |       |       |
|--------------------------------------|-------|-------|
| Streptomyces_griseus_STRGG           | 7007  | 4937  |
| Streptomyces_hygroscopicus_STRHJ     | 9045  | 6067  |
| Streptomyces_lincolnsis_STRLN        | 8566  | 6390  |
| Streptomyces_pratensis_STRFA         | 6557  | 4635  |
| Streptomyces_scabiei_STRSW           | 8699  | 5849  |
| Streptomyces_sp_STREK                | 6353  | 4575  |
| Streptomyces_sp_STRSH                | 5652  | 3772  |
| Streptomyces_toyocaensis_STRTO       | 6314  | 4429  |
| Streptomyces_venezuelae_STRVP        | 7450  | 5044  |
| Streptomyces_viridochromogenes_STRVT | 7705  | 5344  |
| Streptosporangium_roseum_STRRD       | 8954  | 6274  |
| Strigamia_maritima_STRMM             | 14958 | 11235 |
| Strongyloides_papillosus_STREA       | 18206 | 11093 |
| Strongyloides_ratti_STRRB            | 9955  | 7193  |
| Strongyloides_stercoralis_STRER      | 12822 | 8843  |
| Stylonychia_lemnae_STYLE             | 20719 | 10152 |
| Symbiodinium_microadriaticum_SYMMI   | 43268 | 16649 |
| Synechococcus_sp_SYNS7               | 5474  | 3307  |
| Syntrophobacter_fumaroxidans_SYNFM   | 4011  | 2807  |
| Taenia_asiatica_TAEAS                | 10314 | 6997  |
| Taeniopygia_guttata_TAEGU            | 17428 | 16746 |
| Takifugu_rubripes_TAKRU              | 18562 | 18444 |
| Talaromyces_islandicus_TALIS         | 9926  | 8236  |
| Talaromyces_marneffeii_TALMQ         | 10027 | 8221  |
| Talaromyces_stipitatus_TALSN         | 12467 | 9672  |
| Taphrina_deformans_TAPDE             | 4649  | 3865  |
| Tarsius_syrichtha_TARSY              | 20572 | 20137 |
| Tauraco_erythrolophus_TAUER          | 10098 | 9518  |
| Teredinibacter_turnerae_TERTT        | 4248  | 2828  |
| Terriglobus_saanensis_TERSS          | 4176  | 2913  |
| Tetrahymena_thermophila_TETTS        | 26970 | 14843 |
| Tetranychus_urticae_TETUR            | 17525 | 10176 |
| Tetraodon_nigroviridis_TETNG         | 19571 | 19200 |
| Tetrapisispora_blattae_TETBL         | 5384  | 4472  |
| Tetrapisispora_phaffii_TETPH         | 5237  | 4344  |
| Thalassiosira_oceanica_THAOC         | 34546 | 11146 |
| Thanatephorus_cucumeris_THACA        | 10481 | 5361  |
| Thanatephorus_cucumeris_THACB        | 12196 | 8195  |
| Theileria_parva_THEPA                | 4070  | 2136  |
| Thelazia_callipaeda_THECL            | 10893 | 7655  |
| Thelohanellus_kitaei_THEKT           | 14749 | 5329  |
| Theobroma_cacao_THECC                | 29149 | 23212 |
| Thermomonospora_curvata_THECD        | 4887  | 3329  |

|                                  |        |       |
|----------------------------------|--------|-------|
| Thielavia_terrestris_THITE       | 9759   | 7065  |
| Thiocystis_violascens_THIV6      | 4191   | 2814  |
| Thiothrix_nivea_THINJ            | 4217   | 2799  |
| Tinamus_guttatus_TINGU           | 13376  | 12252 |
| Tistrella_mobilis_TISMK          | 5777   | 4434  |
| Togninia_minima_TOGMI            | 8832   | 7392  |
| Torulaspora_delbrueckii_TORDC    | 4965   | 4201  |
| Toxocara_canis_TOXCA             | 18498  | 11465 |
| Toxoplasma_gondii_TOXGV          | 8403   | 4352  |
| Trametes_pubescens_TRAPU         | 14146  | 7524  |
| Trichinella_britovi_TRIBR        | 15465  | 6416  |
| Trichinella_pseudospiralis_TRIPS | 10628  | 5784  |
| Trichinella_spiralis_TRISP       | 15523  | 7564  |
| Trichobilharzia_regenti_TRIRE    | 22145  | 10964 |
| Trichoderma_harzianum_TRIHA      | 11496  | 9057  |
| Trichodesmium_erythraeum_TRIEI   | 4341   | 2783  |
| Trichophyton_equinum_TRIEC       | 8675   | 6143  |
| Trichophyton_rubrum_TRIRC        | 8615   | 6156  |
| Trichosporon_asahii_TRIAC        | 8514   | 5333  |
| Trichuris_muris_TRIMR            | 10587  | 6728  |
| Trichuris_trichiura_TRITR        | 9624   | 7563  |
| Triticum_aestivum_WHEAT          | 102255 | 93965 |
| Triticum_urartu_TRIUA            | 33312  | 27288 |
| Trypanosoma_congolense_TRYCI     | 5905   | 1786  |
| Trypanosoma_cruzi_TRYCC          | 19241  | 9622  |
| Tsukamurella_paurometabola_TSUPD | 4169   | 2991  |
| Tuber_melanosporum_TUBMM         | 7493   | 5479  |
| Tupaia_chinensis_TUPCH           | 20823  | 18603 |
| Turneriella_parva_TURPD          | 4091   | 2385  |
| Tyto_alba_TYTAL                  | 9262   | 8582  |
| Uncinocarpus_reesii_UNCRE        | 7759   | 5783  |
| Uncinula_necator_UNCNE           | 6481   | 4552  |
| Ustilago_hordei_USTH4            | 7109   | 5359  |
| Vanderwaltozyma_polyspora_VANPO  | 5313   | 4345  |
| Variovorax_paradoxus_VARPD       | 6787   | 5255  |
| Verminephrobacter_eiseniae_VEREI | 4910   | 3763  |
| Verrucospora_maris_VERMA         | 5997   | 3960  |
| Verticillium_alfalfae_VERA1      | 10232  | 7645  |
| Verticillium_dahliae_VERDV       | 10529  | 7918  |
| Vibrio_campbellii_VIBCB          | 5604   | 3644  |
| Vibrio_furnissii_VIBFN           | 4439   | 3487  |
| Vibrio_parahaemolyticus_VIBPA    | 4820   | 3412  |
| Vibrio_sp_VIBSJ                  | 4782   | 3690  |

|                                  |       |       |
|----------------------------------|-------|-------|
| Vibrio_sp_VIBSN                  | 4027  | 3000  |
| Vibrio_tasmaniensis_VIBTL        | 4419  | 3236  |
| Vibrio_vulnificus_VIBVY          | 4989  | 3415  |
| Vigna_radiata_VIGRR              | 26452 | 25384 |
| Vitrella_brassicaformis_VITBC    | 23029 | 10462 |
| Wallemia_ichthyophaga_WALI9      | 4835  | 3968  |
| Wallemia_mellicola_WALMC         | 5259  | 4285  |
| Wickerhamomyces_ciferrii_WICCF   | 6697  | 5147  |
| Wuchereria_bancrofti_WUCBA       | 19297 | 10989 |
| Xanthobacter_autotrophicus_XANP2 | 4970  | 3455  |
| Xanthomonas_oryzae_XANOR         | 4381  | 3102  |
| Xenopus_laevis_XENLA             | 41561 | 31494 |
| Xenorhabdus_bovienii_XENBS       | 4101  | 2495  |
| Xenorhabdus_nematophila_XENNA    | 4438  | 2646  |
| Xiphophorus_maculatus_XIPMA      | 20376 | 20010 |
| Zancudomyces_culisetae_ZANCU     | 7386  | 4165  |
| Zobellia_galactanivorans_ZOBGA   | 4707  | 2980  |
| Zootermopsis_nevadensis_ZOONE    | 14525 | 10147 |
| Zostera_marina_ZOSMR             | 20357 | 18128 |
| Zunongwangia_profunda_ZUNPS      | 4632  | 2856  |
| Zygosaccharomyces_rouxii_ZYGRC   | 4986  | 4200  |
| Zymoseptoria_tritici_ZYMTI       | 10971 | 7559  |
